# Supplementary material
Source: MDPI journal article supplement (https://www.mdpi.com/2073-4344/12/10/1258)
Supplement: s1 [file s1]

**Synthesis of Ce<sub>0.1</sub>La<sub>0.9</sub>MnO<sub>3</sub> Perovskite for Degradation of Endocrine Disrupting  
Chemicals under Visible Photons**

## Supplementary Information

| Sl. No.  | Content                                                                                                                                                                                                                             | Page no. |
|----------|-------------------------------------------------------------------------------------------------------------------------------------------------------------------------------------------------------------------------------------|----------|
| <b>1</b> | <b>Reactions (S1)–(S5):</b> The reaction pathway for the construction of Ce <sub>0.1</sub> La <sub>0.9</sub> MnO <sub>3</sub> (CLMO) by facile hydrothermal approach                                                                | 3        |
| <b>2</b> | <b>Figure S1: (a-b)</b> FE-SEM image of as-prepared Ce <sub>0.1</sub> La <sub>0.9</sub> MnO <sub>3</sub> (CLMO) nanostructures                                                                                                      | 4        |
| <b>3</b> | <b>Figure S2:</b> UV-Visible absorption spectrum of 4-n-nonylphenol (NP). The inset of the figure provided the molecular structure of NP.                                                                                           | 5        |
| <b>3</b> | <b>Figure S3:</b> UV-Visible absorption spectrum of Bisphenol-A. The inset of the figure provided the molecular structure of BPA.                                                                                                   | 6        |
| <b>4</b> | <b>Figure S4:</b> Time dependence UV-Vis absorption spectra of <b>(a)</b> NP (4 x10 <sup>-4</sup> M) and <b>(b)</b> BPA (2 x10 <sup>-4</sup> M), respectively, in the absence of catalyst under visible light illumination at pH-7. | 7        |
| <b>5</b> | <b>Figure S5:</b> Time dependence UV-Vis absorption spectra of <b>(a)</b> NP (4 x10 <sup>-4</sup> M) and <b>(b)</b> BPA (2 x10 <sup>-4</sup> M), respectively, adsorption over CLMO surface; 20 mg/100 mL catalyst dose at pH-7.    | 7        |
| <b>6</b> | <b>Figure S6:</b> The Pseudo-first-order rate kinetics plots of <b>(a)</b> NP and <b>(b)</b> BPA pollutants with various quantities of CLMO catalyst loading at pH-7 under the visible photons illumination.                        | 8        |

|    |                                                                                                                                                                                                                                    |    |
|----|------------------------------------------------------------------------------------------------------------------------------------------------------------------------------------------------------------------------------------|----|
| 7  | <b>Figure S7:</b> The Pseudo-first-order rate kinetics plots of <b>(a)</b> NP and <b>(b)</b> BPA pollutants with a different initial concentration of pollutants over CLMO surface at pH-7 under the visible photons illumination. | 9  |
| 8  | <b>Figure S8:</b> The Pseudo-first-order rate kinetics plots of <b>(a)</b> NP and <b>(b)</b> BPA pollutants over CLMO surface by varying the pH of the reaction medium under the visible photons illumination.                     | 10 |
| 9  | <b>Table S1:</b> Fourier-transform infrared spectroscopy (FTIR) analysis of NP pollutant before and after photodegradation with CLMO catalyst.                                                                                     | 11 |
| 10 | <b>Table S2:</b> Fourier-transform infrared spectroscopy (FTIR) measurement of BPA pollutant before and after photodegradation with CLMO catalyst.                                                                                 | 12 |
| 11 | <b>Table S3:</b> Comparison of efficiency and reaction time of Nonylphenol and Bisphenol A using $\text{Ce}_{0.1}\text{La}_{0.9}\text{MnO}_3$ with previously reported in the literatures.                                         | 13 |

### Synthesis of Ce<sub>0.1</sub>La<sub>0.9</sub>MnO<sub>3</sub> (CLMO) via Facile Hydrothermal approach

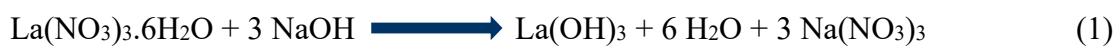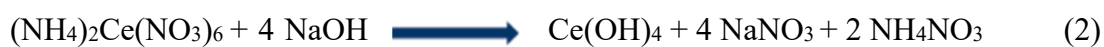

where (A site = La, Ce)

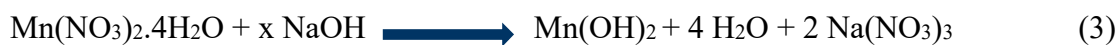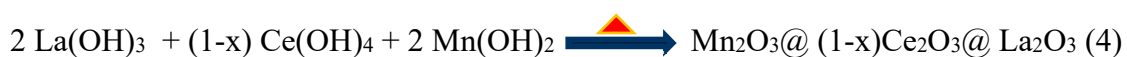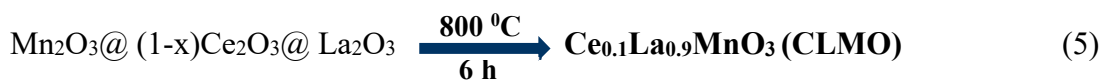

**Reactions (S1)–(S5):** The reaction pathway for the construction of Ce<sub>0.1</sub>La<sub>0.9</sub>MnO<sub>3</sub> (CLMO) by facile hydrothermal approach

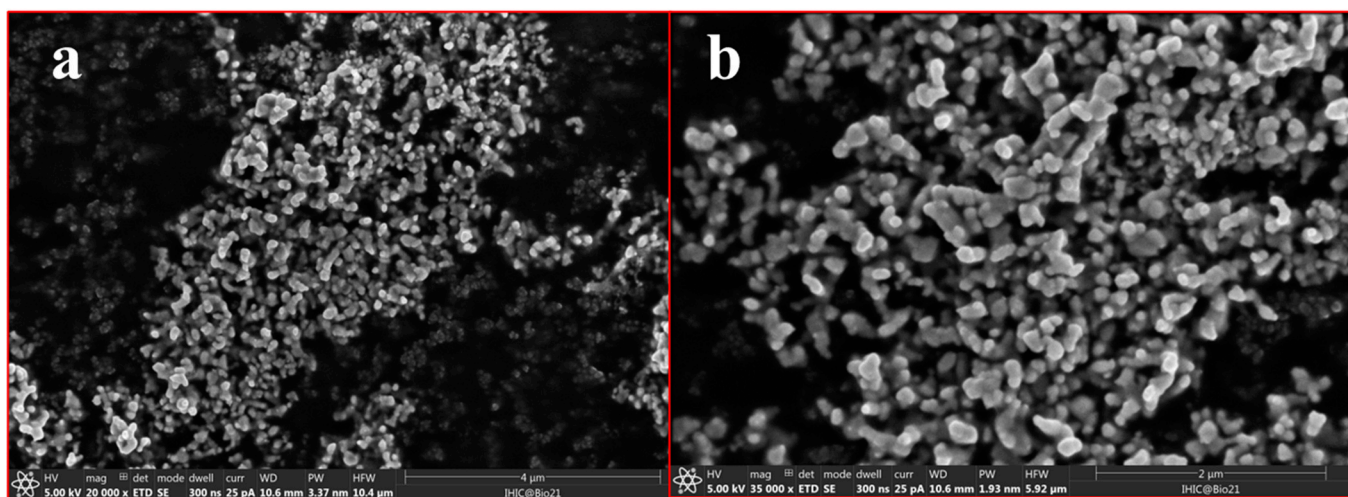

**Figure S1: (a-b) FE-SEM image of as-prepared  $\text{Ce}_{0.1}\text{La}_{0.9}\text{MnO}_3$  (CLMO) nanostructures.**

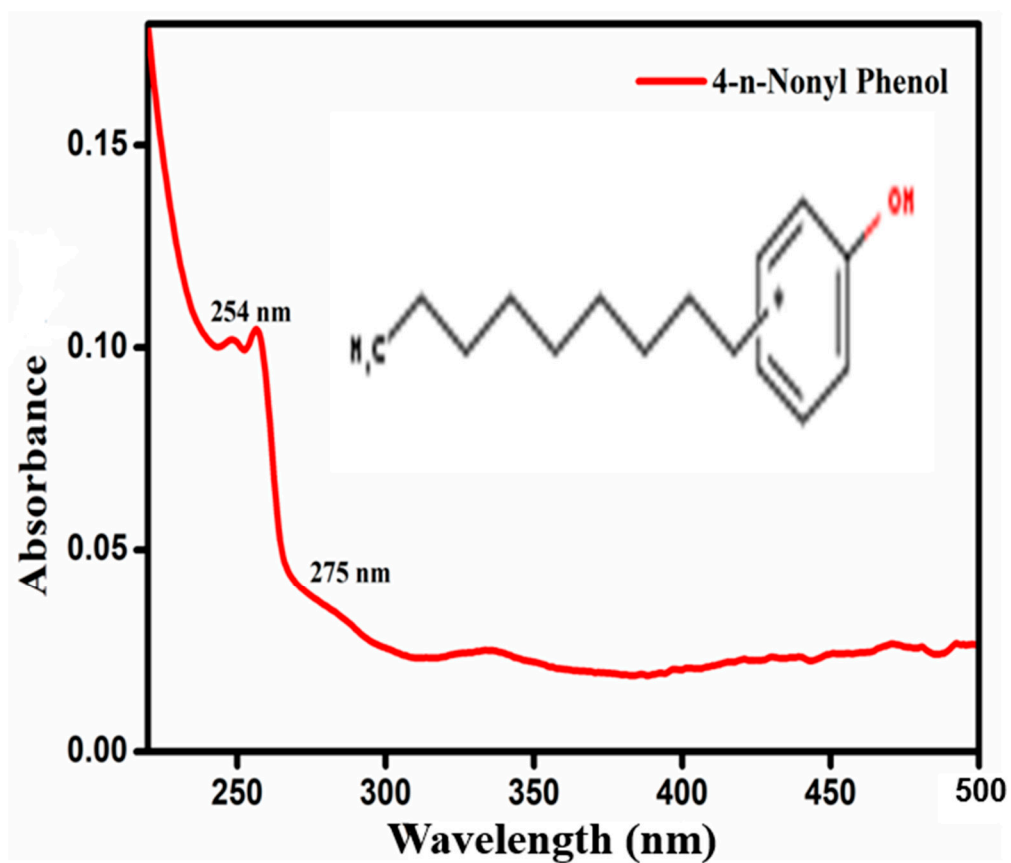

**Figure S2:** UV-Visible absorption spectrum of 4-*n*-nonylphenol (NP). The inset of the figure provided the molecular structure of NP.

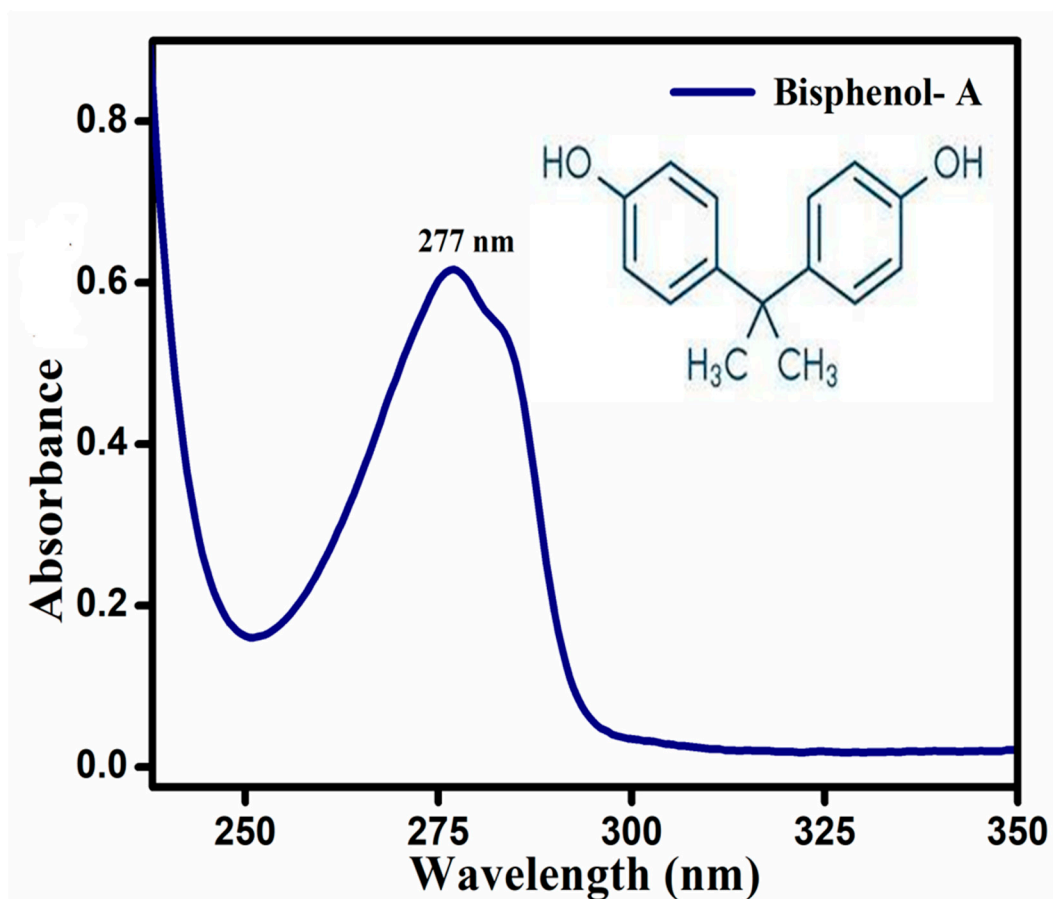

**Figure S3:** UV-Visible absorption spectrum of Bisphenol-A. The inset of the figure provided the molecular structure of BPA.

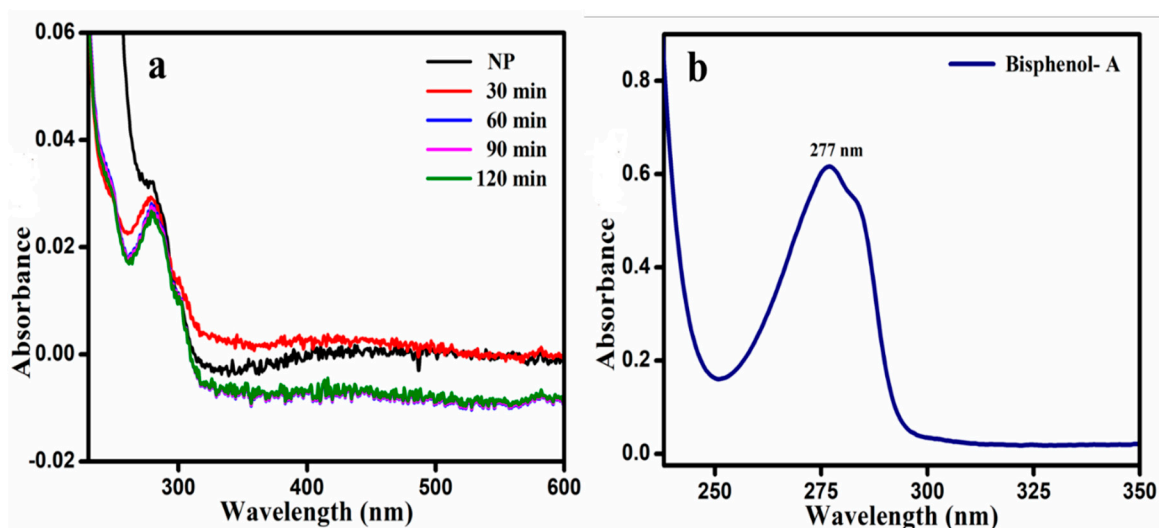

**Figure S4:** Time dependence UV-Vis absorption spectra of (a) NP ( $4 \times 10^{-4}$  M) and (b) BPA ( $2 \times 10^{-4}$  M), respectively, in the absence of catalyst under visible light illumination at pH-7.

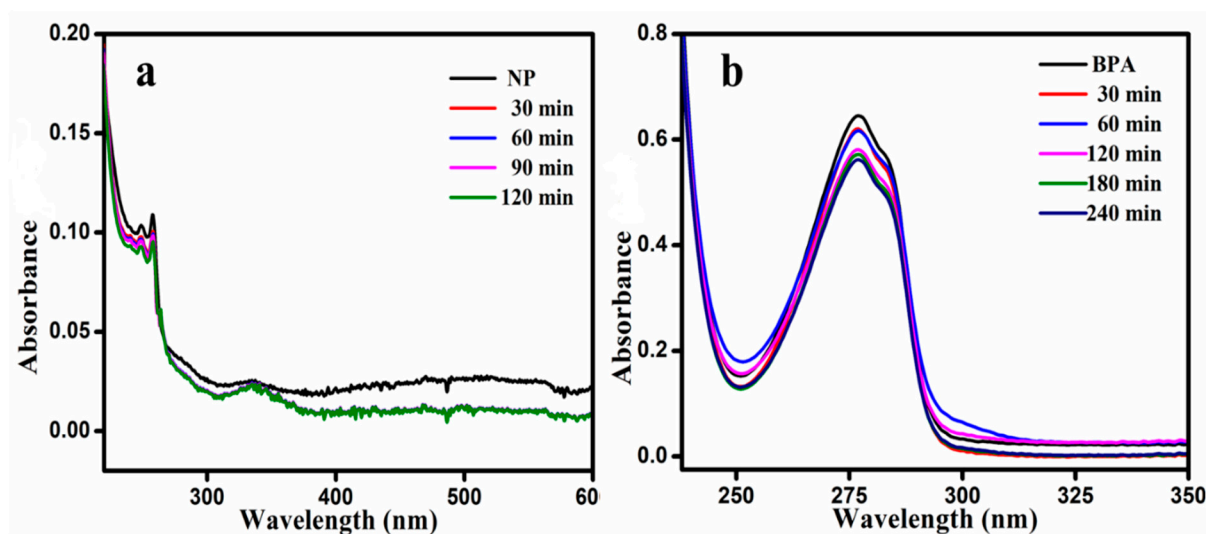

**Figure S5:** Time dependence UV-Vis absorption spectra of (a) NP ( $4 \times 10^{-4}$  M) and (b) BPA ( $2 \times 10^{-4}$  M), respectively, adsorption over CLMO surface; 20 mg/100 mL catalyst dose at pH-7.

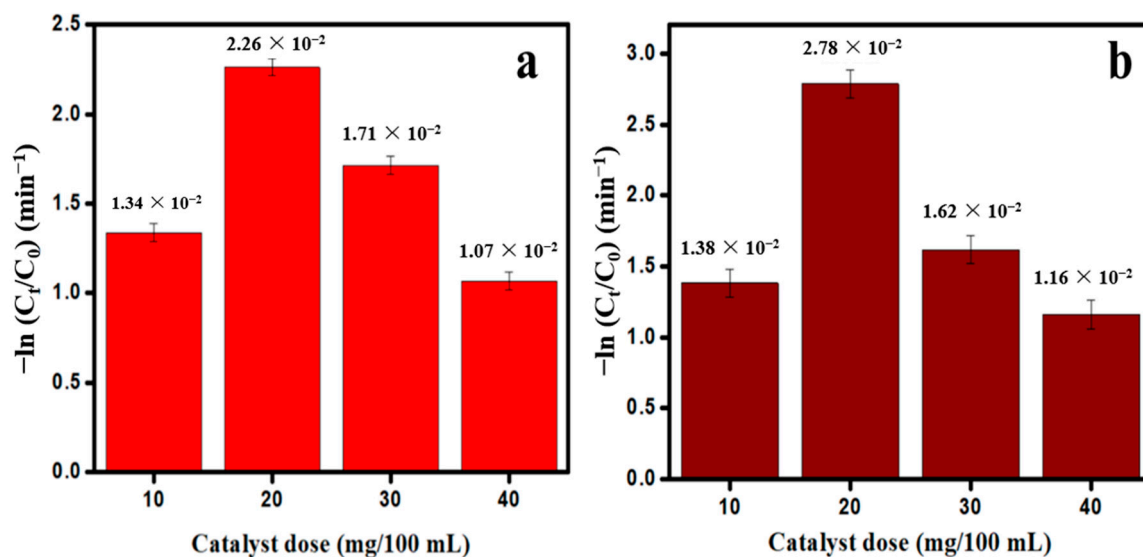

**Figure S6:** The Pseudo-first-order rate kinetics plots of **(a)** NP and **(b)** BPA pollutants with various quantities of CLMO catalyst loading at pH-7 under the visible photons illumination.



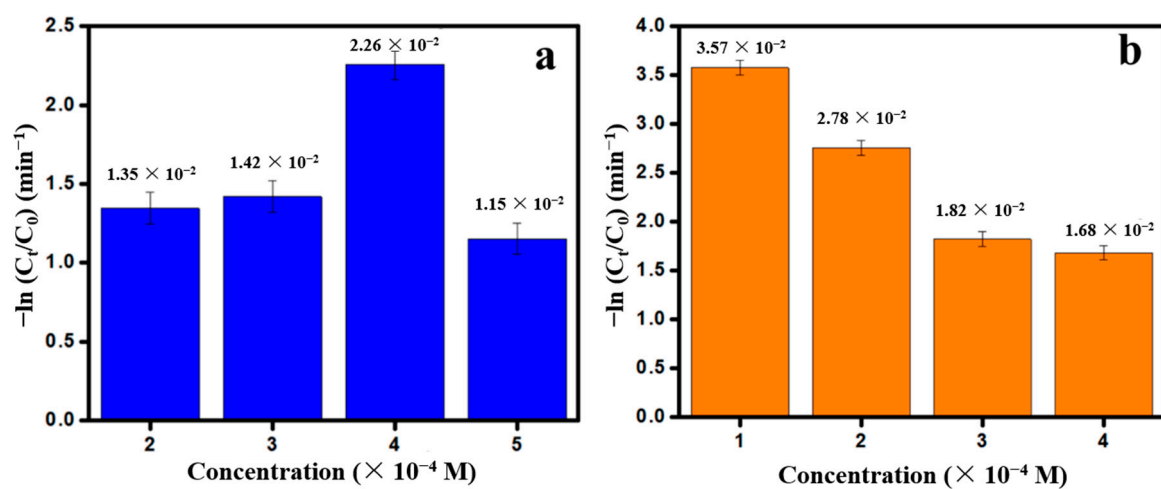

**Figure S7:** The Pseudo-first-order rate kinetics plots of (a) NP and (b) BPA pollutants with a different initial concentration of pollutants over CLMO surface at pH-7 under the visible photons illumination.

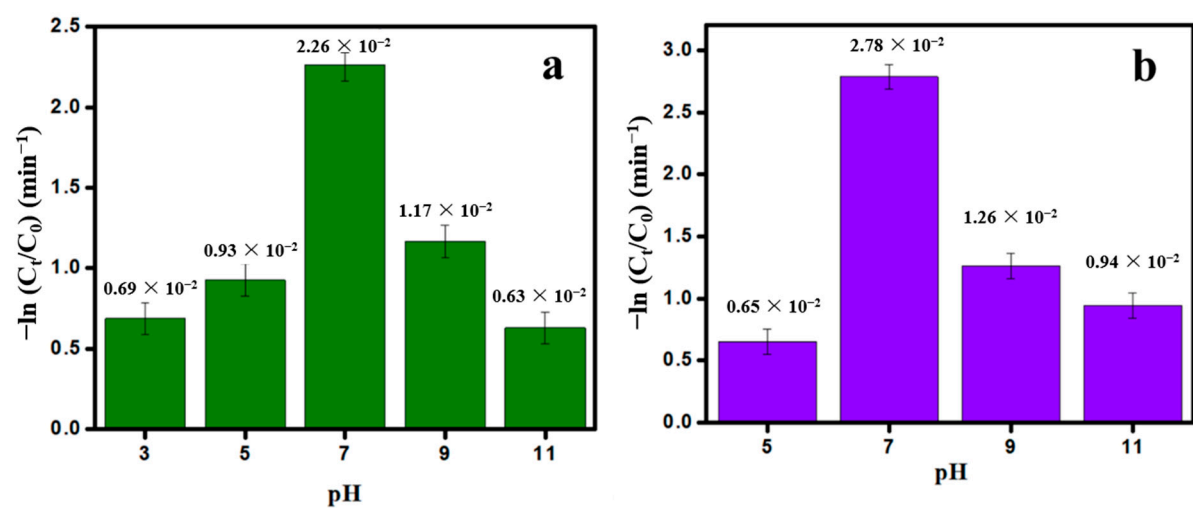

**Figure S8:** The Pseudo-first-order rate kinetics plots of **(a)** NP and **(b)** BPA pollutants over CLMO surface by varying the pH of the reaction medium under the visible photons illumination.

**Table S1:** Fourier-transform infrared spectroscopy (FTIR) analysis of NP pollutant before and after photodegradation with CLMO catalyst.

| Sl. No                                        | Wave Number (cm <sup>-1</sup> ) | Stretching/Bond                                    | Functional Group  |
|-----------------------------------------------|---------------------------------|----------------------------------------------------|-------------------|
| <b>4-n-NonylPhenol (NP) before treatment</b>  |                                 |                                                    |                   |
| 1.                                            | 829                             | C-H ring vibration                                 |                   |
| 2.                                            | 1114                            | C=C bending                                        | Aromatic ring     |
| 3.                                            | 1258                            | C-O stretching                                     |                   |
| 4.                                            | 1614<br>1515<br>1466            | Aromatic C=C stretching                            | Aromatic compound |
| 5.                                            | 2979<br>2956<br>2849            | C-H symmetric and asymmetric stretching vibrations | Alkyl chain       |
| 6.                                            | 3026                            | C-H aromatic stretching                            | Aromatic ring     |
| 7.                                            | 3363                            | O-H stretching<br>Hydrogen bonded                  | Phenolic group    |
| <b>4-n-NonylPhenol (NP) treated over LCMO</b> |                                 |                                                    |                   |
| 8.                                            | 1634                            | C=C stretching                                     | Cyclic alkene     |
| 9.                                            | 3347                            | O-H stretching                                     | Alcohol           |

**Table S2:** Fourier-transform infrared spectroscopy (FTIR) measurement of BPA pollutant before and after photodegradation with CLMO catalyst.

| Sl. No                                     | Wave Number (cm <sup>-1</sup> ) | Stretching/Bond                   | Functional Group            |
|--------------------------------------------|---------------------------------|-----------------------------------|-----------------------------|
| <b>Bisphenol A (BPA) before treatment</b>  |                                 |                                   |                             |
| 1.                                         | 758                             | C-C vibration                     |                             |
| 2.                                         | 828                             | C-H ring vibrations               |                             |
| 3.                                         | 1238                            | C-O stretching                    |                             |
| 4.                                         | 1446                            | C-H scissoring in alkane          | Alkyl group                 |
| 5.                                         | 1611<br>1509                    | C=C aromatic stretching           | Aromatic compound           |
| 6.                                         | 1881                            | =C-O stretching                   | Aromatic Conjugated Alcohol |
| 7.                                         | 2964                            | Aliphatic C-H stretching          | Alkyl group                 |
| 8.                                         | 3027                            | C-H stretching (aromatic)         | Aromatic ring               |
| 9                                          | 3350                            | O-H stretching<br>Hydrogen bonded | Phenolic group              |
| <b>Bisphenol A (BPA) treated over LCMO</b> |                                 |                                   |                             |
| 10.                                        | 1636                            | C=C stretching                    | Conjugated/Cyclic alkene    |
| 11.                                        | 3340                            | O-H stretching                    | Alcohol                     |

**Table S3:** Comparison of efficiency and reaction time of Nonylphenol and Bisphenol A using  $\text{Ce}_{0.1}\text{La}_{0.9}\text{MnO}_3$  with previously reported  $\text{TiO}_2$  based nano catalysts in the literatures.

| Catalyst                                                           | Pollutants                   | Catalyst dosage | Irradiation Source                           | Efficiency and Reaction time                                           | Ref.         |
|--------------------------------------------------------------------|------------------------------|-----------------|----------------------------------------------|------------------------------------------------------------------------|--------------|
| Polyvinylidene fluoride (PVDF)/titanium dioxide ( $\text{TiO}_2$ ) | Nonylphenol                  | 1g / 1L         | UVA source                                   | 85 % in 4 h                                                            | 1            |
| Carbon-doped $\text{TiO}_2$ (CDT)                                  | Nonylphenol (4 mg/L)         | 0.2 g/ 0.1 L    | Vis source (50W Xenon lamp)                  | 99% within 60 min                                                      | 2            |
| $\text{CuO-TiO}_2/\text{GO}$ nanocomposite                         | Bisphenol A (10 mg/L)        | 50 mg/ 50 mL    | Visible light (5 Philips Mercury (Hg) lamps) | 56 % after 300 min                                                     | 3            |
| $\text{Fe-TiO}_2/\text{rGO}$ composite                             | Bisphenol A (95 ppm)         | 50 mg/ 50 mL    | visible light (300-W Xe arc lamp)            | 96 % after 120 min                                                     | 4            |
| Cyclodextrin polymer (CDP) - $\text{TiO}_2$                        | Bisphenol A (20 mg/L))       | 20 mg/ 40 mL    | UVA lamps (365 nm, 4 W, F4T5/BLB)            | 80.2% in 180 min                                                       | 5            |
| $\text{Au-TiO}_2$                                                  | Nonylphenol ethoxylate (NPE) | -----           | Sono and Photo source                        | 100 % in 180 min                                                       | 6            |
| $\text{Ce}_{0.1}\text{La}_{0.9}\text{MnO}_3$                       | Nonylphenol and Bisphenol A  | 20mg/ 100 mL    | Visible source (Osram halogen lamp)          | 92 % and 94 % of NP and BPA pollutants are degraded within 120 and 240 | Present work |

## REFERENCE:

- 1) Hazlini Dzinun, Mohd Hafiz Dzarfan Othman, Ahmad Fauzi Ismail, Mohd Hafiz Puteh, Mukhlis A. Rahman, Juhana Jaafar, *Photocatalytic degradation of nonylphenol by immobilized TiO<sub>2</sub> in dual layer hollow fibre membranes*, **Chemical Engineering Journal**, 2015, 269, 255–261.
- 2) Zahra Noorimotlagh, Iraj Kazeminezhad, Neemat Jaafarzadeh, Mehdi Ahmadie, Zahra Ramezanif, *Improved performance of immobilized TiO<sub>2</sub> under visible light for the commercial surfactant degradation: Role of carbon doped TiO<sub>2</sub> and anatase/ rutile ratio*, **Catalysis Today**, 2020, 348, 277–289.
- 3) Ilknur Altin, *CuO-TiO<sub>2</sub> /graphene ternary nanocomposite for highly efficient visible-light-driven photocatalytic degradation of bisphenol A*, **Journal of Molecular Structure**, 2022, 1252, 132199.
- 4) Huihui Wang, Ning Zhang, Gong Cheng, Han Guo, Zewen Shen, Lu Yang, Yushan Zhao, Ahmed Alsaedi, Tasawar Hayat, Xiangke Wang, *preparing a photocatalytic Fe doped TiO<sub>2</sub>/ rGO for enhanced bisphenol A and its analogues degradation in water sample*, **Applied Surface Science**, 2020, 505, 144640.
- 5) Esmeralda García-Díaz, Danning Zhang, Yilin Li, Rafael Verduzco, Pedro J.J. Alvarez, *TiO<sub>2</sub> microspheres with cross-linked cyclodextrin coating exhibit improved stability and sustained photocatalytic degradation of bisphenol A in secondary effluent*, **Water Research**, 2020, 183, 116095.
- 6) Sambandam Anandan, Muthupandian Ashokkumar, *Sonochemical synthesis of Au-TiO<sub>2</sub> nanoparticles for the sonophotocatalytic degradation of organic pollutants in aqueous environment*, **Ultrasonics Sonochemistry**, 2009, 16, 316–320.
